# Supplementary material
Source: publisher figshare collection journal article supplement (https://sage.figshare.com/ndownloader/files/13158512)
Supplement: Supplementary file 1 [file 13158512]

## Appendix A

## Overview Dimensions and Subscales of the Teacher Relationship Interview

Table A

### *Dimensions and Subscales of the Teacher Relationship Interview*

| Dimension |                                                       | Subscale           |                                                                                                                            |
|-----------|-------------------------------------------------------|--------------------|----------------------------------------------------------------------------------------------------------------------------|
| Content   | “what” is narrated during the interview               | Sensitive          | The teacher is sensitive and proactive in his/her management style.                                                        |
|           |                                                       | Discipline         |                                                                                                                            |
|           |                                                       | Secure Base        | The teacher understands that his/her emotional support is linked to the student’s social, emotional, and cognitive skills. |
|           |                                                       | Perspective Taking | The teacher is aware of the student’s internal states, and providing possible reasons for these states.                    |
|           |                                                       | Intentionality     | The teacher seeks opportunities to promote the student’s growth in the social-emotional and academic domains.              |
| Affect    | affective valence of the information of the interview | Helplessness       | The teacher expresses feelings of hopelessness and ineffectiveness, and refrains from trying new strategies.               |
|           |                                                       | Positive Affect    | The teacher expresses positive feelings, including happiness, closeness, joy, love, pride, etc.                            |
|           |                                                       | Anger              | The teacher is expresses feelings of anger, hostility or disapproval towards the student.                                  |
| Process   | “how” information is represented during the interview | Neutralizing       | The teacher avoids discussing negative emotions.                                                                           |
|           |                                                       | Negative Affect    |                                                                                                                            |
|           |                                                       | Coherence          | The teacher presents experiences in a reasonable and understandable manner.                                                |

*Note.* Sensitive Discipline, Secure Base, Perspective Taking and Intentionality were combined in a new subscale, Sensitive Practices.
